# Supplementary material for: Debris flow event on Osorno volcano, Chile, during summer 2017: new interpretations for chain processes in the southern Andes
Source: Copernicus journal article supplement (doi:10.5194/nhess-21-3015-2021), 2021-10-08
Supplement: Supplementary file 1 [file nhess-21-3015-2021-supplement.pdf]

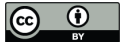

*Supplement of*

## **Debris flow event on Osorno volcano, Chile, during summer 2017: new interpretations for chain processes in the southern Andes**

**Ivo Janos Fustos-Toribio et al.**

*Correspondence to:* Marcelo Somos-Valenzuela ([marcelo.somos@ufrontera.cl](mailto:marcelo.somos@ufrontera.cl)) and Ivo Janos Fustos-Toribio ([ivo.fustos@ufrontera.cl](mailto:ivo.fustos@ufrontera.cl))

The copyright of individual parts of the supplement might differ from the article licence.

## 1 Data

The calibrated parameters with the high sensitivity correspond to the basal friction angle, fluid friction coefficient, and environmental drag coefficient. We considered a solid-phase density of 2.8 (g/cm<sup>3</sup>) due to the Osorno volcano has a basalt-andesite composition.

| Symbol   | Parameter                                                                           | Value | units    | Source/reference                                      |
|----------|-------------------------------------------------------------------------------------|-------|----------|-------------------------------------------------------|
| $\rho_s$ | Solid material density                                                              | 2800  | $kg/m^3$ | Oyarzun (2019) and Somos-Valenzuela et al., 2020      |
| $\rho_f$ | Fluid material density                                                              | 1000  | $kg/m^3$ | Standard for water                                    |
| $\phi$   | Internal friction angle *                                                           | 32.4  | Degree   | This study, laboratory measurements of in-situ sample |
| $\delta$ | Basal friction angle                                                                | 6     | Degree   | Mergili et al. 2018a                                  |
| $C$      | Virtual mass                                                                        | 0.5   | -        | Mergili et al. 2017                                   |
| $U_T$    | Terminal velocity                                                                   | 1     | $m/s$    | Mergili et al. 2017                                   |
| $P$      | Parameter for combination of solid- and fluid-like contributions to drag resistance | 0.5   | -        | Mergili et al. 2018a                                  |
| $Re_p$   | Particle Reynolds number                                                            | 1     | -        | Mergili et al. 2017 and Oyarzun 2019                  |
| $J$      | Exponent for drag                                                                   | 1     | -        | Mergili et al.                                        |

|          |                                             |       |           |                                                   |
|----------|---------------------------------------------|-------|-----------|---------------------------------------------------|
|          |                                             |       |           | 2017 and Oyarzun (2019)                           |
| $N_R$    | Quasi-Reynolds number                       | 4,5   | -         | Oyarzun (2019)                                    |
| $N_{RA}$ | Mobility number                             | 3     | -         | Oyarzun (2019) and Somos-Valenzuela et al. (2020) |
| $\alpha$ | Viscous shearing coefficient for fluid      | 0     | -         | Mergili et al. 2017                               |
| $\xi$    | Solid concentration distribution with depth | 0     | -         | Oyarzun (2019) and Somos-Valenzuela et al. (2020) |
| $C_{AD}$ | Ambient drag coefficient                    | 0,02  | -         | Zwinger et al. (2003)                             |
| $C_E$    | Entrainment coefficient                     | -6,69 | $kg^{-1}$ | Oyarzun (2019) and Somos-Valenzuela et al. (2020) |
| $C_{FF}$ | Fluid friction coefficient                  | 0,001 |           | Oyarzun (2019) and Mergili et al. 2020            |

Table S1. Model parameters used in r.avaflow.

## 2 Methodology

| Parameter           | Value |
|---------------------|-------|
| Hydrogram           | No    |
| Diffusive control   | Yes   |
| Volume conservation | Yes   |
| Surface control     | Yes   |

|                       |               |
|-----------------------|---------------|
| Drag exponent         | Linear        |
| Step Save time (t)    | 10            |
| Simulation lenght (s) | 500           |
| Flow stop             | No            |
| Name                  | Petrohue      |
| DEM                   | ASTER or SRTM |
| Water content range   | 40% - 70%     |

Table S2. Model setup in r.avaflow

## 2.1 Model output

The main output results correspond to the flow height each 10 s of simulation, maximum height reached by the flow, pressure, topography variations, flow velocity and flow volume.

## 3 Additional results

## 3.1 Simulations

### 3.1.1 Simulation with SRTM

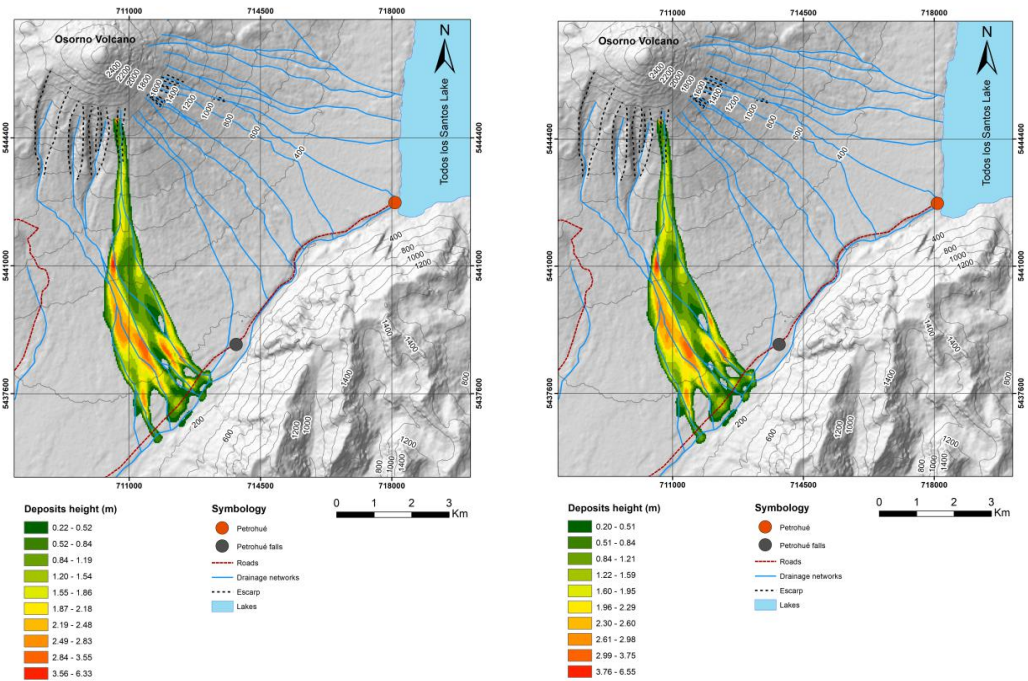

Figure S1. Left: Simulation with r.avaflow using 40% of initial water content. Right: Simulation with r.avaflow using 45% of initial water content.

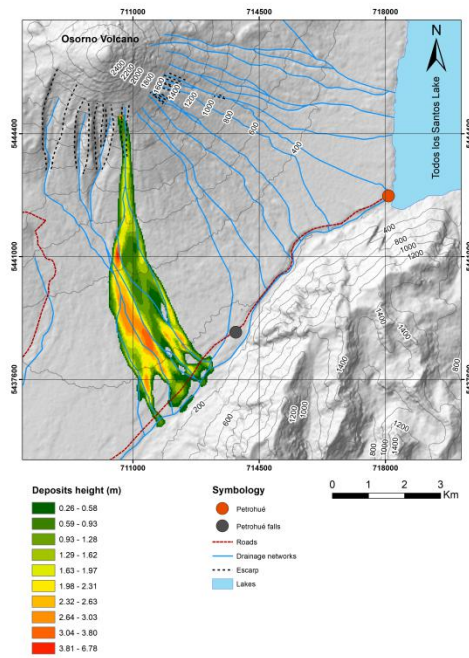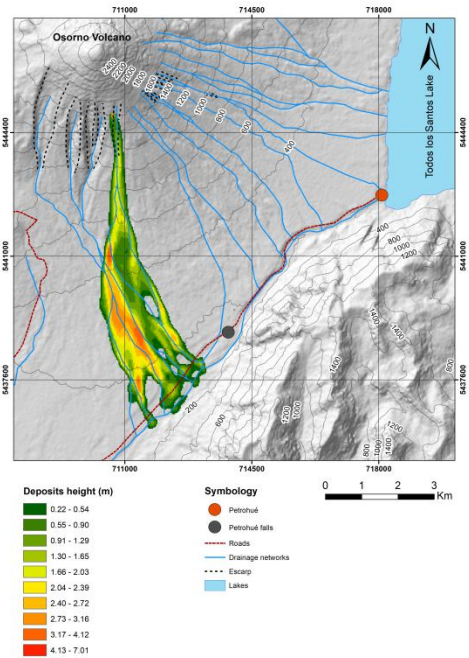

Figure S2. Left: Simulation with r.avaflow using 50% of initial water content. Right: Simulation with r.avaflow using 55% of initial water content.

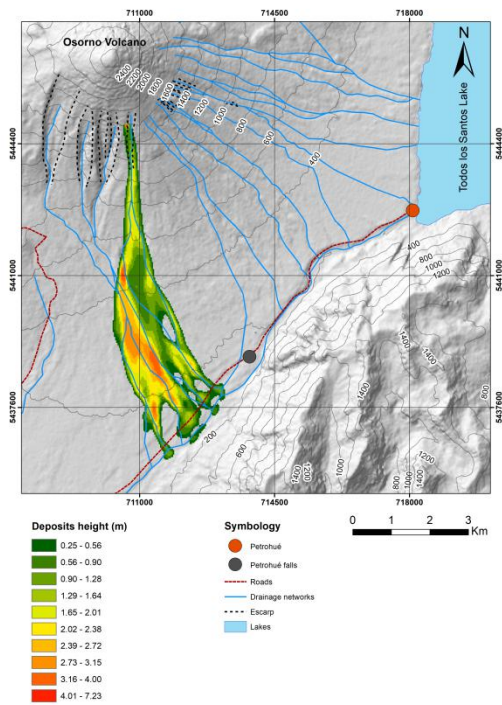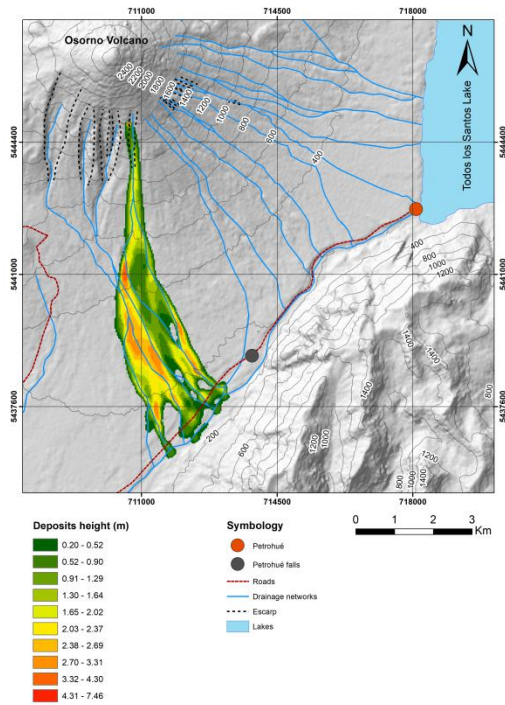

Figure S3. Left: Simulation with r.avaflow using 60% of initial water content. Right: Simulation with r.avaflow using 65% of initial water content.

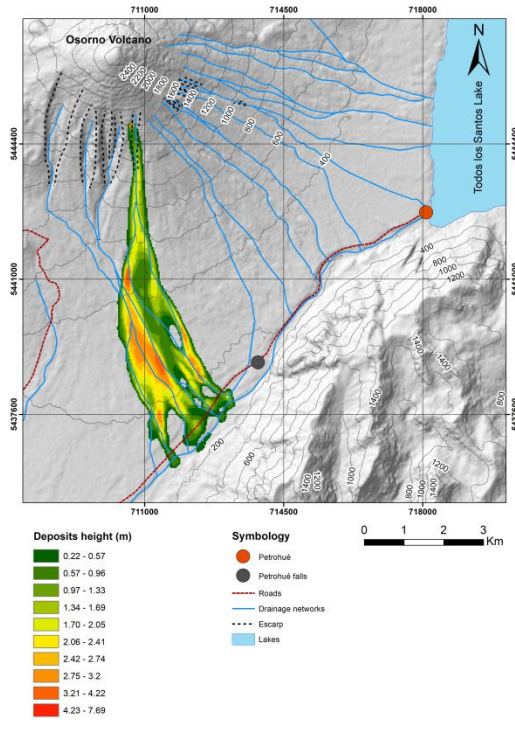

Figure S4. Left: Simulation with r.avaflow using 70% of initial water content.

### 3.1.2 Simulation with ASTER GDEM

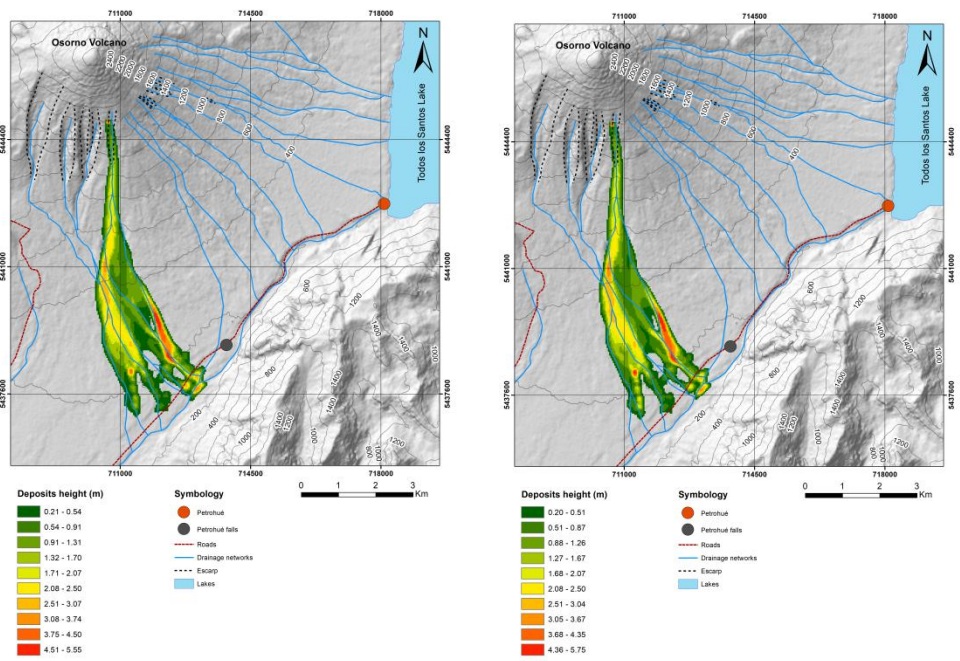

Figure S5. Left: Simulation with r.avaflow using 40% of initial water content. Right: Simulation with r.avaflow using 45% of initial water content.

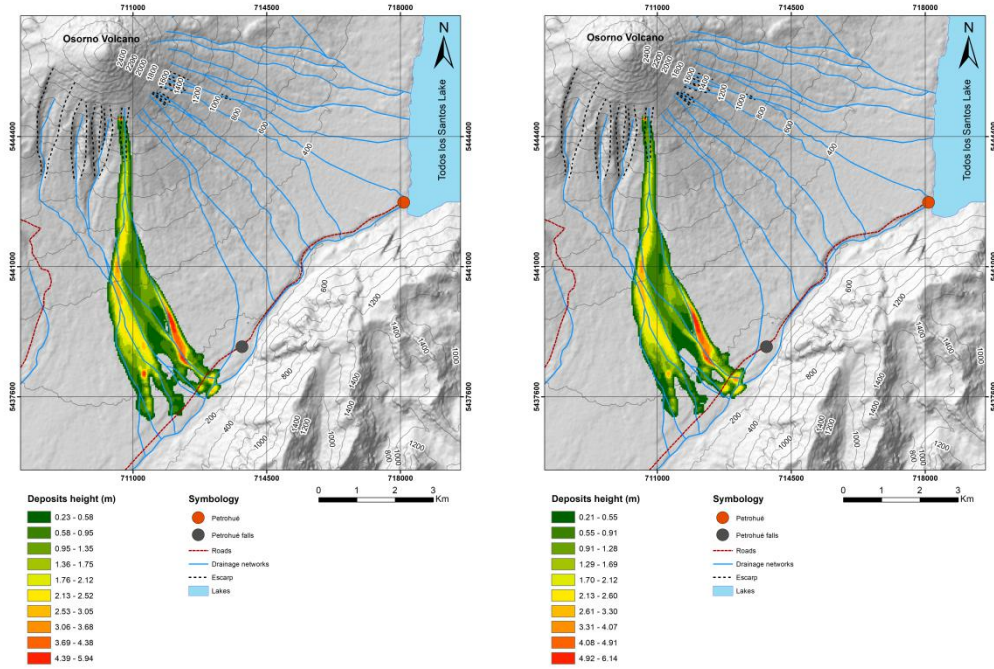

Figure S6. Left: Simulation with r.avafLOW using 50% of initial water content. Right: Simulation with r.avafLOW using 55% of initial water content.

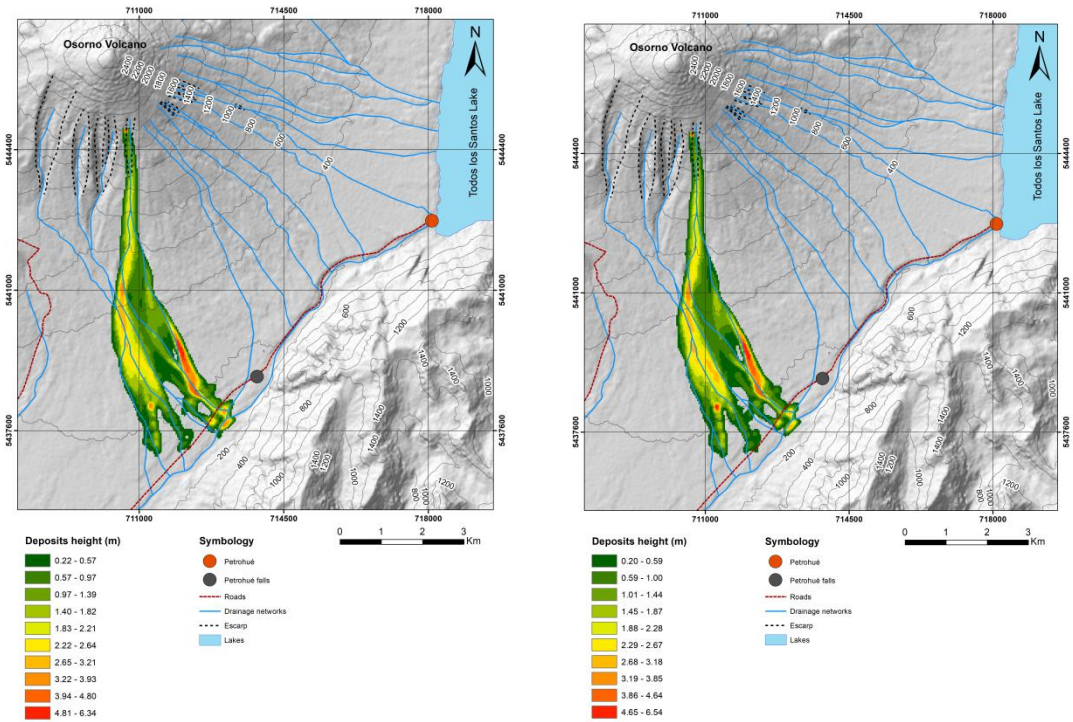

Figure S7. Left: Simulation with r.avafLOW using 60% of initial water content. Right: Simulation with r.avafLOW using 65% of initial water content.



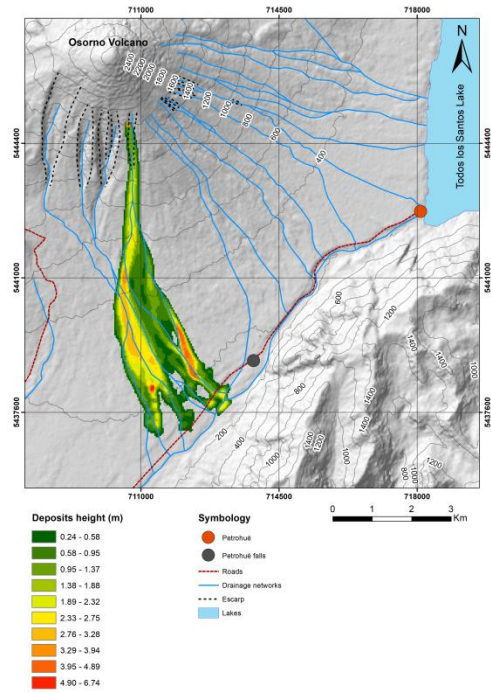

Figure S8. Simulation with r.avaflow using 70% of initial water content.

## 4 Summary

| Simulation code | Initial water content (%) | Area (m <sup>2</sup> ) | Runout (km) | Max height (m) | Final height (m) | Initial volume of lava fall | Final volume |
|-----------------|---------------------------|------------------------|-------------|----------------|------------------|-----------------------------|--------------|
| DEM ASTER GDEM  |                           |                        |             |                |                  |                             |              |
| Simulation 195  | 40%                       | 7.699.909              | 8,06        | 5,55           | 1,63             | 16.670                      | 468.172      |
| Simulation 196  | 45%                       | 7.752.633              | 8,06        | 5,75           | 1,10             | 16.670                      | 464.564      |
| Simulation 159  | 50%                       | 7.656.355              | 8,05        | 5,94           | 1,74             | 16.670                      | 475.812      |
| Simulation 197  | 55%                       | 7.533.716              | 8,04        | 6,14           | 1,62             | 16.670                      | 485.413      |
| Simulation 160  | 60%                       | 7.631.139              | 8,08        | 6,34           | 2,13             | 16.670                      | 499.523      |
| Simulation 198  | 65%                       | 7.797.333              | 8,08        | 6,54           | 1,13             | 16.670                      | 499.363      |
| Simulation 161  | 70%                       | 7.827.133              | 8,05        | 6,74           | 1,58             | 16.670                      | 517.670      |
| DEM SRTM        |                           |                        |             |                |                  |                             |              |
| Simulation 95   | 40%                       | 8.364.900              | 8,78        | 6,33           | 1,87             | 16.670                      | 483.828      |
| Simulation 96   | 45%                       | 8.547.565              | 8,78        | 6,55           | 1,60             | 16.670                      | 499.563      |

|               |     |           |      |      |      |        |         |
|---------------|-----|-----------|------|------|------|--------|---------|
| Simulation 43 | 50% | 8.300.874 | 8,78 | 6,78 | 1,64 | 16.670 | 507.000 |
| Simulation 97 | 55% | 8.483.538 | 8,78 | 7,01 | 1,28 | 16.670 | 527.344 |
| Simulation 44 | 60% | 8.308.406 | 8,78 | 7,23 | 1,33 | 16.670 | 528.373 |
| Simulation 98 | 65% | 8.643.605 | 8,79 | 7,46 | 1,43 | 16.670 | 533.413 |
| Simulation 45 | 70% | 8.600.293 | 8,80 | 7,69 | 1,59 | 16.670 | 544.903 |

Figure S9. Results of r.avaflow using ASTER and SRTM models.

| N° Simulation                                       | Error in runout (%) | Back-analysis height error (%) | Runout (km) | Back-analysis height (m) |  |  |
|-----------------------------------------------------|---------------------|--------------------------------|-------------|--------------------------|--|--|
| DEM ASTER GDEM with respect to back-analysis height |                     |                                |             |                          |  |  |
| Simulation 195                                      | -8%                 | 63%                            | 8,7         | 1,5                      |  |  |
| Simulation 196                                      | -8%                 | 10%                            |             |                          |  |  |
| Simulation 159                                      | -7%                 | 16%                            |             |                          |  |  |
| Simulation 197                                      | -8%                 | 8%                             |             |                          |  |  |
| Simulation 160                                      | -7%                 | 42%                            |             |                          |  |  |
| Simulation 198                                      | -7%                 | -25%                           |             |                          |  |  |
| Simulation 161                                      | -7%                 | 5%                             |             |                          |  |  |
| DEM SRTM with respect to back-analysis height       |                     |                                |             |                          |  |  |
| Simulation 95                                       | 1%                  | 25%                            |             |                          |  |  |
| Simulation 96                                       | 1%                  | 7%                             |             |                          |  |  |
| Simulation 43                                       | 1%                  | 9%                             |             |                          |  |  |
| Simulation 97                                       | 1%                  | -15%                           |             |                          |  |  |
| Simulation 44                                       | 1%                  | -11%                           |             |                          |  |  |
| Simulation 98                                       | 1%                  | -5%                            |             |                          |  |  |
| Simulation 45                                       | 1%                  | 6%                             |             |                          |  |  |

Figure S10. r.avaflow error.

## 5 Reference

Mergili, M., Fischer, J. T., Krenn, J., & Pudasaini, S. P. (2017). r.avaflow v1, an advanced open-source computational framework for the propagation and interaction of two-phase mass flows. *Geoscientific Model Development*, 10(2), 553-569.

Mergili, M., Frank, B., Fischer, J. T., Huggel, C., & Pudasaini, S. P. (2018). Computational experiments on the 1962 and 1970 landslide events at Huascarán (Peru) with r. avaflow: Lessons learned for predictive mass flow simulations. *Geomorphology*, 322, 15-28.

Mergili, M., Emmer, A., Juřicová, A., Cochachin, A., Fischer, J. T., Huggel, C., & Pudasaini, S. P. (2018b). How well can we simulate complex hydro-geomorphic process chains? The 2012 multi-lake outburst flood in the Santa Cruz Valley (Cordillera Blanca, Perú). *Earth surface processes and landforms*, 43(7), 1373-1389.

Mergili, M., Jaboyedoff, M., Pullarello, J., & Pudasaini, S. P. (2020). Back calculation of the 2017 Piz Cengalo–Bondo landslide cascade with r. avaflow: what we can do and what we can learn. *Natural Hazards & Earth System Sciences*, 20(2)

Oyarzún, J. (2019). Análisis de los factores gatillantes al flujo hiperconcentrado en Villa Santa Lucía y determinación de las condicionantes de un proceso futuro. Trabajo de Proyecto de Titulación para optar al Título de Ingeniero Civil. Universidad de La Frontera, Facultad de Ingeniería y ciencia.

Somos-Valenzuela, M. A., Oyarzún-Ulloa, J. E., Fustos-Toribio, I. J., Garrido-Urzuu, N., & Chen, N. (2020). The mudflow disaster at Villa Santa Lucía in Chilean Patagonia: understandings and insights derived from numerical simulation and postevent field surveys. *Natural Hazards and Earth System Sciences*, 20(8), 2319–2333. <https://doi.org/10.5194/nhess-20-2319-2020>

Zwinger, T., Kluwick, A., & Sampl, P. (2003). Numerical simulation of dry-snow avalanche flow over natural terrain. In *Dynamic response of granular and porous materials under large and catastrophic deformations* (pp. 161-194). Springer, Berlin, Heidelberg.
